# Supplementary material
Source: PubMed Central journal article supplement (PMC8742659)
Supplement: NIHMS1747319-supplement-Supplemental_Material.pdf [file NIHMS1747319-supplement-Supplemental_Material.pdf]

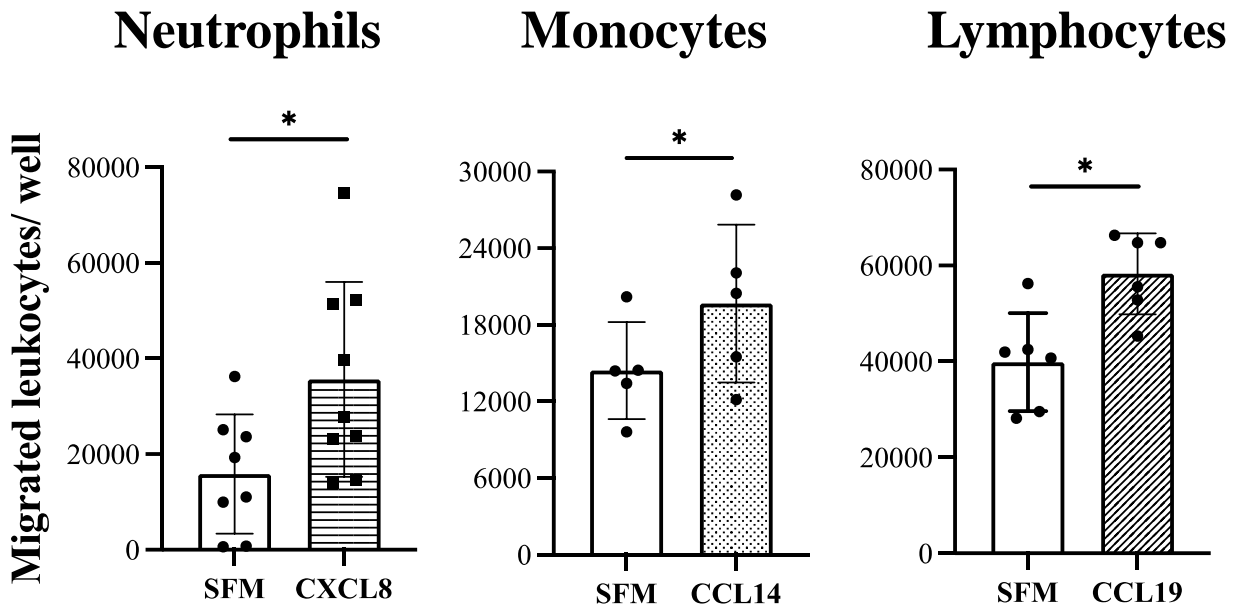

**Supplemental Figure 1: Demonstration of trans-endothelial migration of primary human leukocytes towards cell-specific chemokines.** Isolated human neutrophils, monocytes, and lymphocytes and uterine microvascular endothelial cells (UtMVEC) monolayers were pre-incubated for 2 hours prior to trans-endothelial migration assay with IL-8 (100ng/ml), CCL14 (100ng/ml) or CCL19 (25ng/ml). IL-8 (checked bar) was used as chemoattractant for neutrophils, CCL14 (stripped bar) for monocyte positive control, and CCL19 (dotted bar) for lymphocyte positive control. Leukocytes (200,000 cells/well) were loaded into endothelial-coated inserts, and allowed to transmigrate for 1 hour (neutrophils) or 16 hours (monocytes and lymphocytes) towards IL-8, CCL14, and CCL19. Serum free media (SFM, solid white bar) was used as a negative control. Results are shown in a box plot as number of primary leukocytes transmigrated through membrane insert/well. Values are presented as median, with the interquartile range. Statistical significance was determined by paired t-test, \*p<0.05.

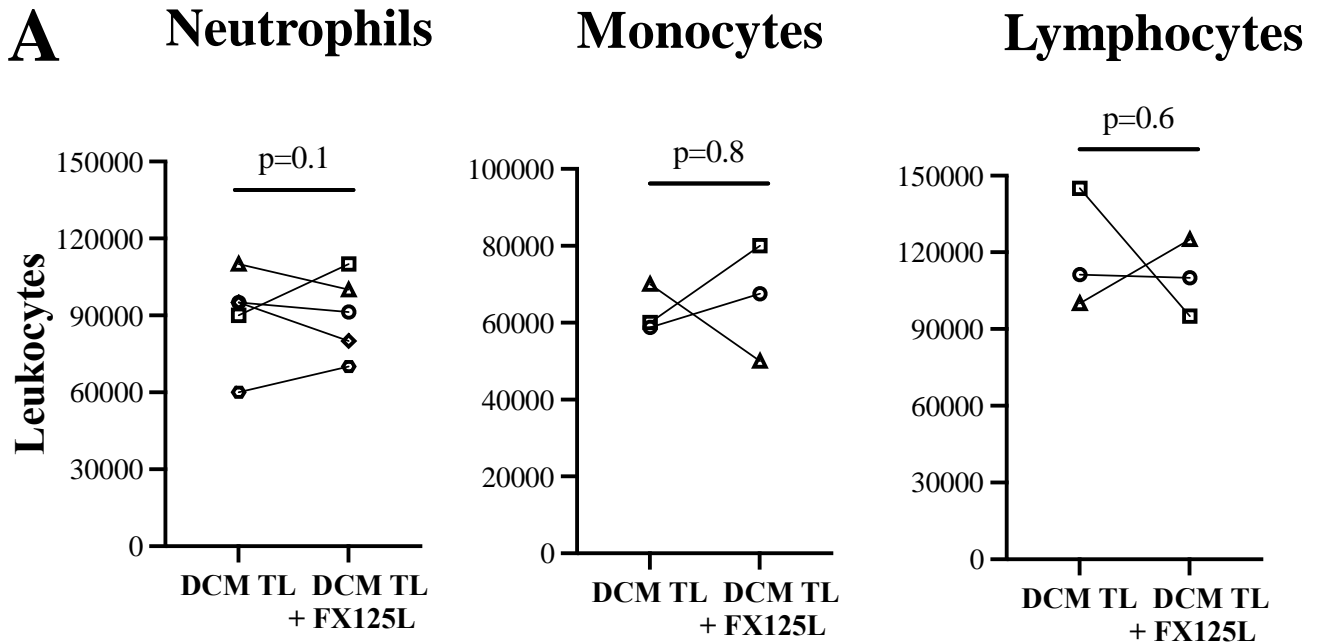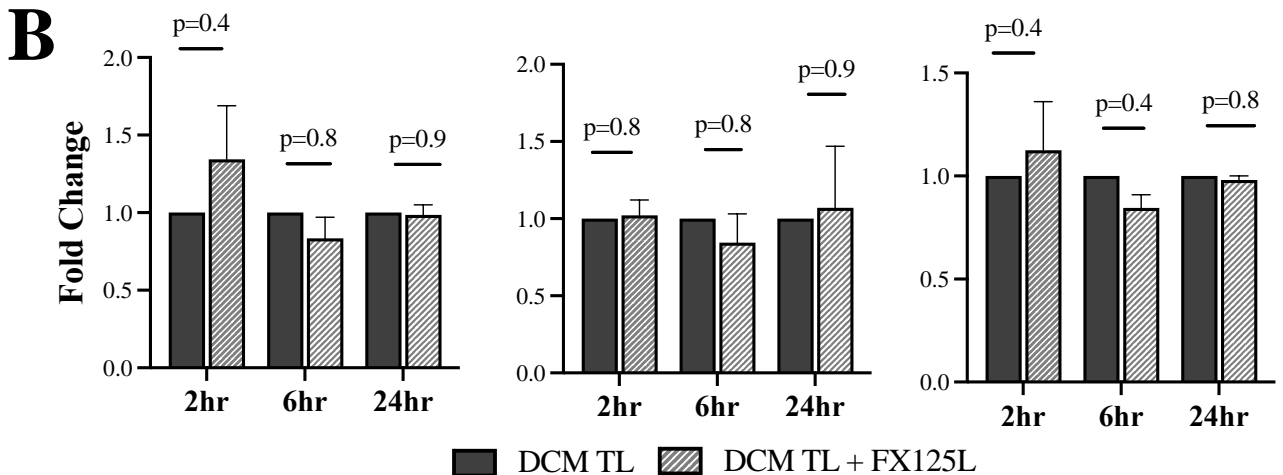

**Supplemental Figure 2: The BSCI (FX125L) has no effect on cell viability of human peripheral blood leukocytes.** Trypan Blue viability test and Flow cytometry analysis were used to confirm the absence of toxic effect of FX125L on primary leukocytes. (A) Isolated primary maternal leukocytes (neutrophils, monocytes, and lymphocytes, N=3-5/group), were treated with decidual conditioned media (TL DCM)  $\pm$  FX125L (400nM) for 2 hours (neutrophils) and 18 hours (monocytes and lymphocytes). Cells were then incubated with 0.4% Trypan Blue solution and counted under the microscope using a hemocytometer. (B) Flow Cytometry was used to confirm the absence of toxic effect of FX125L on primary leukocytes isolated from peripheral blood of pregnant women (16-18 gestational weeks, N=1) and non-pregnant woman (N=1). Whole blood was incubated with TL DCM  $\pm$  FX125L for 2, 6, and 24 hours. Leukocytes identified by CD45 (pan-leukocyte marker), were stained with a fluorophore-conjugated Abs specific for monocytes (CD14), granulocytes (CD15), and T-lymphocytes (CD3). Values are presented as mean  $\pm$  SD. Statistical significance was determined by paired t-tests between treatments.

Supplemental Table 1. Patients Demographics

|                                          | <b>TNL<br/>Decidua</b> | <b>TL<br/>Decidua</b> | <b>TNL<br/>Myometrium</b> | <b>TL<br/>Myometrium</b> |
|------------------------------------------|------------------------|-----------------------|---------------------------|--------------------------|
| Number of samples                        | 19                     | 7                     | 17                        | 6                        |
| Maternal Age<br>(mean years $\pm$ SD)    | 32.6 $\pm$ 5.7         | 32.0 $\pm$ 4.5        | 37.4 $\pm$ 4.4            | 34.8 $\pm$ 3.5           |
| Parity (range)                           | 0-3                    | 0-1                   | 0-2                       | 0-2                      |
| Maternal BMI<br>(mean $\pm$ SD)          | 31.0 $\pm$ 7.8         | 28.7 $\pm$ 3.3        | 28.2 $\pm$ 7.6            | 33.9 $\pm$ 2.7           |
| Gestational Age<br>(mean weeks $\pm$ SD) | 38.8 $\pm$ 0.5         | 38.8 $\pm$ 0.4        | 38.8 $\pm$ 0.8            | 39.5 $\pm$ 0.8           |
| Neonatal gender<br>(Male/Female, %)      | 55/45                  | 57/43                 | 35/65                     | 33/67                    |

Supplemental Table 2. Forty human cytokines analyzed using the Bio-plex Pro Human Chemokine assay (BioRad, Hercules, CA).

| <b>Symbol</b>                  | <b>Name</b>                         | <b>Assay Standard Range (pg/ml)</b> | <b>Sensitivity (pg/ml)</b> |
|--------------------------------|-------------------------------------|-------------------------------------|----------------------------|
| <b>CCL1</b>                    | Chemokine (C-C motif) Ligand 1      | 2.2- 35345                          | 1.6                        |
| <b>CCL2</b>                    | Chemokine (C-C motif) Ligand 2      | 0.2- 3668                           | 0.1                        |
| <b>CCL3</b>                    | Chemokine (C-C motif) Ligand 3      | 0.3- 4433                           | 0.3                        |
| <b>CCL7</b>                    | Chemokine (C-C motif) Ligand 7      | 1.5- 23898                          | 1.3                        |
| <b>CCL8</b>                    | Chemokine (C-C motif) Ligand 8      | 0.3- 4355                           | 0.04                       |
| <b>CCL11</b>                   | Chemokine (C-C motif) Ligand 11     | 1.7- 27354                          | 2.5                        |
| <b>CCL13</b>                   | Chemokine (C-C motif) Ligand 13     | 0.2- 2896                           | 0.1                        |
| <b>CCL15</b>                   | Chemokine (C-C motif) Ligand 15     | 1.5- 24284                          | 0.2                        |
| <b>CCL17</b>                   | Chemokine (C-C motif) Ligand 17     | 1.4- 23374                          | 1.1                        |
| <b>CCL19</b>                   | Chemokine (C-C motif) Ligand 19     | 2.3- 37312                          | 1.1                        |
| <b>CCL20</b>                   | Chemokine (C-C motif) Ligand 20     | 0.6- 9286                           | 0.1                        |
| <b>CCL21</b>                   | Chemokine (C-C motif) Ligand 21     | 2.6-42091                           | 12.0                       |
| <b>CCL22</b>                   | Chemokine (C-C motif) Ligand 22     | 1.1- 18233                          | 0.5                        |
| <b>CCL23</b>                   | Chemokine (C-C motif) Ligand 23     | 1- 15964                            | 0.23                       |
| <b>CCL24</b>                   | Chemokine (C-C motif) Ligand 24     | 1.04- 16995                         | 3.2                        |
| <b>CCL25</b>                   | Chemokine (C-C motif) Ligand 25     | 6.3- 102616                         | 4.9                        |
| <b>CCL26</b>                   | Chemokine (C-C motif) Ligand 26     | 0.9- 14324                          | 0.5                        |
| <b>CCL27</b>                   | Chemokine (C-C motif) Ligand 27     | 1.2-19445                           | 3.4                        |
| <b>CXCL1</b>                   | Chemokine (C-X-C motif) Ligand 1    | 2.9- 46851                          | 6.3                        |
| <b>CXCL2</b>                   | Chemokine (C-X-C motif) Ligand 2    | 1.2- 19090                          | 2.7                        |
| <b>CXCL5</b>                   | Chemokine (C-X-C motif) Ligand 6    | 13.2- 216942                        | 5.7                        |
| <b>CXCL6</b>                   | Chemokine (C-X-C motif) Ligand 6    | 1 - 15719                           | 0.6                        |
| <b>CXCL9</b>                   | Chemokine (C-X-C motif) Ligand 9    | 5.6- 92565                          | 1.2                        |
| <b>CXCL11</b>                  | Chemokine (C-X-C motif) Ligand 11   | 1.5- 25273                          | 0.05                       |
| <b>CXCL12</b>                  | Chemokine (C-X-C motif) Ligand 12   | 9.9- 161788                         | 10.3                       |
| <b>CXCL13</b>                  | Chemokine (C-C motif) Ligand 13     | 0.3-5641                            | 0.1                        |
| <b>CXCL16</b>                  | Chemokine (C-X-C motif) Ligand 16   | 0.3- 5329                           | 0.1                        |
| <b>CX3CL1</b>                  | Chemokine (C-X3-C motif) Ligand 1   | 4.35- 71290                         | 0.9                        |
| <b>GM-CSF</b>                  | Granulocyte-Macrophage CS Factor    | 2.25- 36901                         | 0.2                        |
| <b>IFN-<math>\gamma</math></b> | Interferon gamma                    | 0.15- 2393                          | 6.4                        |
| <b>IL1b</b>                    | Interleukin 1 beta                  | 3.6- 58216                          | 0.6                        |
| <b>IL2</b>                     | Interleukin-2                       | 0.4- 6182                           | 1.6                        |
| <b>IL4</b>                     | Interleukin-4                       | 0.6- 10332                          | 0.7                        |
| <b>IL6</b>                     | Interleukin-6                       | 1.1- 18143                          | 2.6                        |
| <b>IL8</b>                     | Interleukin-8                       | 0.7- 11342                          | 1.0                        |
| <b>IL10</b>                    | Interleukin-10                      | 1.8- 28901                          | 0.3                        |
| <b>IL16</b>                    | Interleukin-16                      | 1.6- 26246                          | 0.4                        |
| <b>IP-10</b>                   | Interferon gamma-induced protein 10 | 0.3- 5522                           | 1.1                        |
| <b>MIF</b>                     | Macrophage Inhibitory Factor        | 20.5- 336202                        | 1.5                        |
| <b>TNF-<math>\alpha</math></b> | Tumor necrosis factor alpha         | 0.8- 13398                          | 6.0                        |

Supplemental Table 3. Five human cytokines analyzed using the Bio-plex Pro Human Chemokine assay (BioRad, Hercules, CA).

| <b>Symbol</b>      | <b>Name</b>                                                                                        | <b>Assay Working Range (pg/ml)</b> | <b>Sensitivity (pg/ml)</b> |
|--------------------|----------------------------------------------------------------------------------------------------|------------------------------------|----------------------------|
| <b>IL-1RA</b>      | Interleukin-1 receptor antagonist                                                                  | 7.41-121425                        | 5.5                        |
| <b>CSF3/G-CSF</b>  | Granulocyte colony-stimulating factor                                                              | 1.73-28267                         | 1.7                        |
| <b>CCL4/ MIP1b</b> | Chemokine (C-C-motif) Ligand 4<br>Macrophage inflammatory protein beta                             | 0.28-4543                          | 2.4                        |
| <b>CCL5/RANTES</b> | Chemokine (C-C-motif) Ligand 5<br>Regulated on Activation, Normal T-cell<br>Expressed and Secreted | 0.91-14838                         | 1.8                        |
| <b>VEGF</b>        | Vascular Endothelial Growth Factor                                                                 | 2.37-38806                         | 3.1                        |

Supplemental Table 4. List of 27 cytokines analyzed using Pro Human Cytokine assay (BioRad, Hercules, CA)

| Symbol             | Name                                                          | Assay Working Range (pg/ml) | Sensitivity (pg/ml) |
|--------------------|---------------------------------------------------------------|-----------------------------|---------------------|
| <b>Eotaxin</b>     | Eotaxin                                                       | 40.9-5824                   | 2.5                 |
| <b>FGF basic</b>   | Basic fibroblast growth factor                                | 27.2-75811                  | 0.9                 |
| <b>G-CSF</b>       | Granulocyte-colony stimulating factor                         | 2.4-11565                   | 1.7                 |
| <b>GM-CSF</b>      | Granulocyte-macrophage colony-stimulating factor              | 63.3-60392                  | 0.2                 |
| <b>IFN-g</b>       | Interferon gamma                                              | 92.6-52719                  | 6.4                 |
| <b>IL-1b</b>       | Interleukin 1 beta                                            | 3.2-3261                    | 0.6                 |
| <b>IL-1RA</b>      | Interleukin 1 receptor antagonist                             | 81.1-70487                  | 5.5                 |
| <b>IL-2</b>        | Interleukin-2                                                 | 2.1-17772                   | 1.6                 |
| <b>IL-4</b>        | Interleukin-4                                                 | 2.2-3467                    | 0.7                 |
| <b>IL-5</b>        | Interleukin-5                                                 | 3.1-7380                    | 0.6                 |
| <b>IL-6</b>        | Interleukin-6                                                 | 2.3-18880                   | 2.6                 |
| <b>IL-7</b>        | Interleukin-7                                                 | 3.1-6001                    | 1.1                 |
| <b>IL-8</b>        | Interleukin-8                                                 | 1.9-26403                   | 1                   |
| <b>IL-9</b>        | Interleukin-9                                                 | 2.1-7989                    | 2.5                 |
| <b>IL-10</b>       | Interleukin-10                                                | 2.2-8840                    | 0.3                 |
| <b>IL-12</b>       | Interleukin-12                                                | 3.3-13099                   | 3.5                 |
| <b>IL-13</b>       | Interleukin-13                                                | 3.7-3137                    | 0.7                 |
| <b>IL-15</b>       | Interleukin-15                                                | 2.1-2799                    | 2.4                 |
| <b>IL-17</b>       | Interleukin-17                                                | 4.9-12235                   | 3.3                 |
| <b>IP-10</b>       | Interferon gamma-induced protein 10                           | 18.8-26867                  | 6.1                 |
| <b>MCP-1/CCL2</b>  | Monocyte chemoattractant protein 1                            | 2.1-1820                    | 1.1                 |
| <b>MIP-1a/CCL3</b> | Macrophage inflammatory protein 1 alpha                       | 1.4-836                     | 1.6                 |
| <b>MIP-1b/CCL4</b> | Macrophage inflammatory protein 1 beta                        | 2-1726                      | 2.4                 |
| <b>PDGF-bb</b>     | Platelet-derived growth factor-BB                             | 7-51933                     | 2.9                 |
| <b>RANTES/CCL5</b> | Regulated on activation, normal T cell expressed and secreted | 2.2-8617                    | 1.8                 |
| <b>TNFa</b>        | Tumor necrosis factor alpha                                   | 5.8-95484                   | 6                   |
| <b>VEGF</b>        | Vascular endothelial growth factor                            | 5.5-56237                   | 3.1                 |

**Supplemental Table 5.** Primer pair sequences used in qRT-PCR endothelial CAM expression analysis.

| <b>GENE</b>    | <b>Rfseq mRNA accession no</b> | <b>Primer sequences (5'-3')</b>                                     |
|----------------|--------------------------------|---------------------------------------------------------------------|
| <i>ICAM-1</i>  | NM_000201                      | F: GAC CGC AGA GGA CGA GGG CA<br>R: TTG GGC GCC GGA AAG CTG TAG     |
| <i>VCAM-1</i>  | NM_001078                      | F: TCC AGG TGG AGC TCT ACT CAT TCC<br>R: CGG TCA AGG GGG TAC ACG CT |
| <i>PECAM-1</i> | NM_000442                      | F: TCC ACC AGC GTC ATT GGC GT<br>R: TGC CCT TGC GGT GTT AGG CA      |
| <i>SELE</i>    | NM_000450                      | F: TCT GCT GCT GGA CTC TCC CTC C<br>R: GCA GCT CTG GCA GGA ACA AA   |
| <i>TBP</i>     | NM_003194                      | F: TGC ACA GGA GCC AAG AGT GAA<br>R: CAC ATC ACA GCT CCC CAC CA     |
| <i>YWHAZ</i>   | NM_003406                      | F: ACT TTT GGT ACA TTG TGG CTT CAA<br>R: CCG CCA GGA CAA ACC AGT AT |
| <i>SDHA</i>    | NM_004168                      | F: TGG GAA CAA GAG GGC ATC TG<br>R: CCA CCA CTG CAT CAA ATT CAT G   |
